# Supplementary material
Source: publisher figshare collection journal article supplement (https://frontiersin.figshare.com/ndownloader/files/15584993)
Supplement: Supplementary file [file 15584993]

**Supplementary Figure 1.** Sequence alignment of the complete hexon genes of HAdV-1 (D11) and FeAdV.

|        |     |                                                     |     |
|--------|-----|-----------------------------------------------------|-----|
| HAdV-1 | 1   | GCTACCCCTTCGATGATGCCGCAGTGGTCTTACATGCACATCTCGGGCCA  | 50  |
|        |     |                                                     |     |
| FeAdV  | 1   | GCTACCCCTTCGATGATGCCGCAGTGGTCTTACATGCACATCTCGGGCCA  | 50  |
|        |     |                                                     |     |
|        | 51  | GGACGCCTCGGAGTACCTGAGCCCCGGGCTGGTGCAGTTCGCCCCGCGCCA | 100 |
|        |     |                                                     |     |
|        | 51  | GGACGCCTCGGAGTACCTGAGCCCCGGGCTGGTGCAGTTCGCCCCGCGCCA | 100 |
|        |     |                                                     |     |
|        | 101 | CCGAGACGTACTTCAGCCTGAATAACAAGTTTAGAAACCCACGGTGGCG   | 150 |
|        |     |                                                     |     |
|        | 101 | CCGAGACGTACTTCAGCCTGAATAACAAGTTTAGAAACCCACGGTGGCG   | 150 |
|        |     |                                                     |     |
|        | 151 | CCTACGCACGACGTGACCACAGACCGGTCTCAGCGTTTGACGCTGCGGTT  | 200 |
|        |     |                                                     |     |
|        | 151 | CCTACGCACGACGTGACCACAGACCGGTCTCAGCGTTTGACGCTGCGGTT  | 200 |
|        |     |                                                     |     |
|        | 201 | TATCCCCGTGGACCGCGAGGATAACCGCATACTCGTACAAGGCGCGGTTTA | 250 |
|        |     |                                                     |     |
|        | 201 | TATCCCCGTGGACCGCGAGGATAACCGCATACTCGTACAAGGCGCGGTTTA | 250 |
|        |     |                                                     |     |
|        | 251 | CCCTGGCTGTGGGTGACAACCGTGTGCTTGACATGGCTTCCACATACTTT  | 300 |
|        |     |                                                     |     |
|        | 251 | CCCTGGCTGTGGGTGACAACCGTGTGCTTGACATGGCTTCCACATACTTT  | 300 |
|        |     |                                                     |     |
|        | 301 | GACATTTCGCGGCGTGCTGGACCGGGGCCCACTTTTAAGCCCTACTCCGG  | 350 |
|        |     |                                                     |     |
|        | 301 | GACATTTCGCGGCGTGCTGGACCGGGGCCCACTTTTAAGCCCTACTCCGG  | 350 |
|        |     |                                                     |     |
|        | 351 | CACTGCCTACAACGCTCTAGCCCCCAAGGGCGCTCCCAATTCTGCGAGT   | 400 |
|        |     |                                                     |     |
|        | 351 | CACTGCCTACAACGCTCTAGCCCCCAAGGGCGCTCCCAATTCTGCGAGT   | 400 |
|        |     |                                                     |     |
|        | 401 | GGGAACAAGAAGAACCAACTCAGGAAATGGCTGAAGAACTTGAAGATGAG  | 450 |
|        |     |                                                     |     |
|        | 401 | GGGAACAAGAAGAACCAACTCAGGAAATGGCTGAAGAACTTGAAGATGAG  | 450 |
|        |     |                                                     |     |
|        | 451 | GAGGAGGCAGAGGAGGAGGAGGCAGAGGAGGAGGCAGAAGCACCACAAGC  | 500 |
|        |     |                                                     |     |
|        | 451 | GAGGAGGCAGAGGAGGAGGAGGCAGAGGAGGAGGCAGAAGCACCACAAGC  | 500 |
|        |     |                                                     |     |
|        | 501 | TGATCAGAAGGTTAAGAAGACTCATGTATATGCTCAGGCTCCTTTGGCAG  | 550 |
|        |     |                                                     |     |
|        | 501 | TGATCAGAAGGTTAAGAAGACTCATGTATATGCTCAGGCTCCTTTGGCAG  | 550 |
|        |     |                                                     |     |
|        | 551 | GGGAAAAAATTACCGCCAATGGCTTACAAATAGTTTCTGATACCCAAACT  | 600 |
|        |     |                                                     |     |
|        | 551 | GGGAAAAAATTACCGCCAATGGCTTACAAATAGTTTCTGATACCCAAACT  | 600 |
|        |     |                                                     |     |
|        | 601 | GAAGGCAATCCAGTTTTTGGCGATCCCACTTATCAACCTGAACCTCAGGT  | 650 |
|        |     |                                                     |     |
|        | 601 | GAAGGCAATCCAGTTTTTGGCGATCCCACTTATCAACCTGAACCTCAGGT  | 650 |

|      |                                                     |      |
|------|-----------------------------------------------------|------|
| 651  | TGGAGAATCTCAGTGAATGAAGCTGAAGCAACTGCATCTGGAGGCAGAG   | 700  |
|      |                                                     |      |
| 651  | TGGAGAATCTCAGTGAATGAAGCTGAAGCAACTGCATCTGGAGGCAGAG   | 700  |
|      |                                                     |      |
| 701  | TACTAAAAAAGACTACTCCCATGAAACCATGCTACGGATCGTATGCCAGA  | 750  |
|      |                                                     |      |
| 701  | TACTAAAAAAGACTACTCCCATGAAACCATGCTACGGATCGTATGCCAGA  | 750  |
|      |                                                     |      |
| 751  | CCTACAAATAAAAATGGGGGTCAAGGTATACTAGTAGCAAACAACCAAGG  | 800  |
|      |                                                     |      |
| 751  | CCTACAAATAAAAATGGGGGTCAAGGTATACTAGTAGCAAACAACCAAGG  | 800  |
|      |                                                     |      |
| 801  | TGCTCTAGAGTCTAAAGTTGAAATGCAGTTTTTTGCCCCCTCTGGCACTG  | 850  |
|      |                                                     |      |
| 801  | TGCTCTAGAGTCTAAAGTTGAAATGCAGTTTTTTGCCCCCTCTGGCACTG  | 850  |
|      |                                                     |      |
| 851  | CCATGAATGAAAGAAATGCTGTTCAGCCAAGTATTGTTTTGTACAGTGAG  | 900  |
|      |                                                     |      |
| 851  | CCATGAATGAAAGAAATGCTGTTCAGCCAAGTATTGTTTTGTACAGTGAG  | 900  |
|      |                                                     |      |
| 901  | GATGTTAATATGGAAACTCCTGATACTCACATTTTCATACAAACCAAGCAA | 950  |
|      |                                                     |      |
| 901  | GATGTTAATATGGAAACTCCTGATACTCACATTTTCATACAAACCAAGCAA | 950  |
|      |                                                     |      |
| 951  | AACTGATGAAAACCTCTAAGGCTATGTTGGGTCAACAAGCAATGCCAAACA | 1000 |
|      |                                                     |      |
| 951  | AACTGATGAAAACCTCTAAGGCTATGTTGGGTCAACAAGCAATGCCAAACA | 1000 |
|      |                                                     |      |
| 1001 | GACCCAATTACATCGCTTTTAGGGACAATTTTATTGGCCTTATGTATTAC  | 1050 |
|      |                                                     |      |
| 1001 | GACCCAATTACATCGCTTTTAGGGACAATTTTATTGGCCTTATGTATTAC  | 1050 |
|      |                                                     |      |
| 1051 | AACAGCACTGGTAACATGGGTGTCCTTGCTGGACAAGCATCACAGCTAAA  | 1100 |
|      |                                                     |      |
| 1051 | AACAGCACTGGTAACATGGGTGTCCTTGCTGGACAAGCATCACAGCTAAA  | 1100 |
|      |                                                     |      |
| 1101 | TGCCGTGGTAGACTTGCAGGACAGAAACACAGAGCTGTCATATCAACTTT  | 1150 |
|      |                                                     |      |
| 1101 | TGCCGTGGTAGACTTGCAGGACAGAAACACAGAGCTGTCATATCAACTTT  | 1150 |
|      |                                                     |      |
| 1151 | TGCTTGATTCTATTGGCGATAGAACCAGATACTTTTCCATGTGGAATCAG  | 1200 |
|      |                                                     |      |
| 1151 | TGCTTGATTCTATTGGCGATAGAACCAGATACTTTTCCATGTGGAATCAG  | 1200 |
|      |                                                     |      |
| 1201 | GCTGTAGACAGCTATGATCCAGATGTCAGAATCATTGAAAATCATGGAAC  | 1250 |
|      |                                                     |      |
| 1201 | GCTGTAGACAGCTATGATCCAGATGTCAGAATCATTGAAAATCATGGAAC  | 1250 |
|      |                                                     |      |
| 1251 | TGAGGATGAGTTGCCAAATTACTGCTTCCCACTTGGCGGTATAGGGGTAA  | 1300 |
|      |                                                     |      |
| 1251 | TGAGGATGAGTTGCCAAATTACTGCTTCCCACTTGGCGGTATAGGGGTAA  | 1300 |
|      |                                                     |      |
| 1301 | CTGACACCTACCAAGGTATAAAATCAAACGGAAACGGTAATCCTCAAAAC  | 1350 |
|      |                                                     |      |
| 1301 | CTGACACCTACCAAGGTATAAAATCAAACGGAAACGGTAATCCTCAAAAC  | 1350 |
|      |                                                     |      |

|      |                                                             |      |
|------|-------------------------------------------------------------|------|
| 1351 | TGGACCAAAAATGACGATTTTGCGGCACGTAATGAAATAGGTGTGGGAAA          | 1400 |
|      |                                                             |      |
| 1351 | TGGACCAAAAATGACGATTTTGCGGCACGTAATGAAATAGGTGTGGGAAA          | 1400 |
|      |                                                             |      |
| 1401 | CAACTTTGCCCTGGAGATTAACCTTAATGCCAACCTATGGAGAAATTTCC          | 1450 |
|      |                                                             |      |
| 1401 | CAACTTTGCCCTGGAGATTAACCTTAATGCCAACCTATGGAGAAATTTCC          | 1450 |
|      |                                                             |      |
| 1451 | TCTACTCCAACATTGCACTGTACCTGCCTGACAAGCTAAAATACACTCCT          | 1500 |
|      |                                                             |      |
| 1451 | TCTACTCCAACATTGCACTGTACCTGCCTGACAAGCTAAAATACACTCCT          | 1500 |
|      |                                                             |      |
| 1501 | ACAAATGTGGAAATATCTCCCAACCCTAATTCATACGATTATATGAACAA          | 1550 |
|      |                                                             |      |
| 1501 | ACAAATGTGGAAATATCTCCCAACCCTAATTCATACGATTATATGAACAA          | 1550 |
|      |                                                             |      |
| 1551 | GCGAGTGGTGGCTCCCGGGTTGGTGGATTGCTACATTAACCTTGGAGCGC          | 1600 |
|      |                                                             |      |
| 1551 | GCGAGTGGTGGCTCCCGGGTTGGTGGATTGCTACATTAACCTTGGAGCGC          | 1600 |
|      |                                                             |      |
| 1601 | GTTGGTCATTGGACTACATGGACAACGTCAACCCCTTTAACCATCACCGC          | 1650 |
|      |                                                             |      |
| 1601 | GTTGGTCATTGGACTACATGGACAACGTCAACCCCTTTAACCATCACCGC          | 1650 |
|      |                                                             |      |
| 1651 | AATGCGGGCCTACGCTACCGCTCCATGTTGCTGGGCAACGGTCGCTACGT          | 1700 |
|      |                                                             |      |
| 1651 | AATGCGGGCCTACGCTACCGCTCCATGTTGCTGGGCAACGGTCGCTACGT          | 1700 |
|      |                                                             |      |
| 1701 | GCCCTTTTACATCCAGGTTCCCTCAGAAGTTTTTTGCCATTAAGAACCTCC         | 1750 |
|      |                                                             |      |
| 1701 | GCCCTTTTACATCCAGGTTCCCTCAGAAGTTTTTTGCCATTAAGAACCTCC         | 1750 |
|      |                                                             |      |
| 1751 | TACTCTTGCCGGGCTCATACACCTACGAGTGGAACCTCAGGAAAGATGTT          | 1800 |
|      |                                                             |      |
| 1751 | TACTCTTGCCGGGCTCATACACCTACGAGTGGAACCTCAGGAAAGATGTT          | 1800 |
|      |                                                             |      |
| 1801 | AACATGGTCCTGCAAAGCTCCCTAGGAAACGACCTAAGAGTTGACGGAGC          | 1850 |
|      |                                                             |      |
| 1801 | AACATGGTCCTGCAAAGCTCCCTAGGAAACGACCTAAGAGTTGACGGAGC          | 1850 |
|      |                                                             |      |
| 1851 | CAGCATTAAGTTTGACAGCATTTGCCTCTACGCCACCTT <b>Y</b> TTTCCGATGG | 1900 |
|      |                                                             |      |
| 1851 | CAGCATTAAGTTTGACAGCATTTGCCTCTACGCCACCTT <b>T</b> TTTCCGATGG | 1900 |
|      |                                                             |      |
| 1901 | CCCACAACACCGCCTCAACGCTTGAAGCCATGCTTAGAAACGACACCAAC          | 1950 |
|      |                                                             |      |
| 1901 | CCCACAACACCGCCTCAACGCTTGAAGCCATGCTTAGAAACGACACCAAC          | 1950 |
|      |                                                             |      |
| 1951 | GACCAGTCCTTTAACGACTACCTATCCGCCGCCAACATGCTTTACCCCAT          | 2000 |
|      |                                                             |      |
| 1951 | GACCAGTCCTTTAACGACTACCTATCCGCCGCCAACATGCTTTACCCCAT          | 2000 |
|      |                                                             |      |
| 2001 | ACCCGCCAACGCCACCAACGTGCCCATCTCTATCCCCTCGCGCAACTGGG          | 2050 |
|      |                                                             |      |
| 2001 | ACCCGCCAACGCCACCAACGTGCCCATCTCTATCCCCTCGCGCAACTGGG          | 2050 |
|      |                                                             |      |

|      |                                                     |      |
|------|-----------------------------------------------------|------|
| 2051 | CGGCTTTCCGAGGCTGGGCCTTTACGCGCCTTAAGACTAAGGAAACCCCA  | 2100 |
|      |                                                     |      |
| 2051 | CGGCTTTCCGAGGCTGGGCCTTTACGCGCCTTAAGACTAAGGAAACCCCA  | 2100 |
|      |                                                     |      |
| 2101 | TCCCTGGGTTCCGGCTACGACCCTTACTATACCTACTCTGGCTCCATACC  | 2150 |
|      |                                                     |      |
| 2101 | TCCCTGGGTTCCGGCTACGACCCTTACTATACCTACTCTGGCTCCATACC  | 2150 |
|      |                                                     |      |
| 2151 | CTACCTAGACGGAACCTTTTACCTTAATCACACCTTCAAAAAGGTGGCCA  | 2200 |
|      |                                                     |      |
| 2151 | CTACCTAGACGGAACCTTTTACCTTAATCACACCTTCAAAAAGGTAGCCA  | 2200 |
|      |                                                     |      |
| 2201 | TCACCTTTGACTCTTCTGTAGCTGGCCTGGCAATGACCGTCTGCTTACC   | 2250 |
|      |                                                     |      |
| 2201 | TCACCTTTGACTCTTCTGTAGCTGGCCTGGCAATGACCGTCTGCTTACC   | 2250 |
|      |                                                     |      |
| 2251 | CCCAACGAGTTTGAGATCAAGCGTTCAGTTGACGGAGAGGGCTACAACGT  | 2300 |
|      |                                                     |      |
| 2251 | CCCAACGAGTTTGAGATCAAGCGTTCAGTTGACGGAGAGGGCTACAACGT  | 2300 |
|      |                                                     |      |
| 2301 | TGCCCCAATGCAACATGACCAAAGACTGGTTCTTGGTACAGATGCTAGCCA | 2350 |
|      |                                                     |      |
| 2301 | TGCCCCAATGCAACATGACCAAAGACTGGTTCTTGGTACAGATGCTAGCCA | 2350 |
|      |                                                     |      |
| 2351 | ACTACAACATAGGCTACCAGGGCTTTTATATCCCAGAAAGCTATAAGGAC  | 2400 |
|      |                                                     |      |
| 2351 | ACTACAACATAGGCTACCAGGGCTTTTATATCCCAGAAAGCTATAAGGAC  | 2400 |
|      |                                                     |      |
| 2401 | CGCATGTACTCCTTCTTTAGAAACTTCCAGCCCATGAGCCGTCAGGTGGT  | 2450 |
|      |                                                     |      |
| 2401 | CGCATGTACTCCTTCTTTAGAAACTTCCAGCCCATGAGCCGTCAGGTGGT  | 2450 |
|      |                                                     |      |
| 2451 | GGACGATACCAAATACAAGGACTACCAACAGGTGGGCATCCTCCACCAGC  | 2500 |
|      |                                                     |      |
| 2451 | GGACGATACCAAATACAAGGACTACCAACAGGTGGGCATCCTCCACCAGC  | 2500 |
|      |                                                     |      |
| 2501 | ACAATAACTCTGGCTTTGTTGGTTACCTCGCTCCCACCATGCGAGAGGGA  | 2550 |
|      |                                                     |      |
| 2501 | ACAATAACTCTGGCTTTGTTGGTTACCTCGCTCCCACCATGCGAGAGGGA  | 2550 |
|      |                                                     |      |
| 2551 | CAGGCCTACCCCGCCAACTTCCCCTACCCGCTTATAGGCAAGACCGCGGT  | 2600 |
|      |                                                     |      |
| 2551 | CAGGCCTACCCCGCCAACTTCCCCTACCCGCTTATAGGCAAGACCGCGGT  | 2600 |
|      |                                                     |      |
| 2601 | TGACAGTATTACCCAGAAAAAGTTTCTTTGCGACCGCACCCCTTTGGCGCA | 2650 |
|      |                                                     |      |
| 2601 | TGACAGTATTACCCAGAAAAAGTTTCTTTGCGACCGCACCCCTTTGGCGCA | 2650 |
|      |                                                     |      |
| 2651 | TTCCATTCTCCAGTAACTTTATGTCCATGGGTGCACTCACAGACCTGGGC  | 2700 |
|      |                                                     |      |
| 2651 | TTCCATTCTCCAGTAACTTTATGTCCATGGGTGCACTCACAGACCTGGGC  | 2700 |
|      |                                                     |      |
| 2701 | CAAAACCTTCTCTATGCAAACCTCCGCCCACGCGCTAGATATGACTTTTGA | 2750 |
|      |                                                     |      |
| 2701 | CAAAACCTTCTCTATGCAAACCTCCGCCCACGCGCTAGATATGACTTTTGA | 2750 |
|      |                                                     |      |

|      |                                                    |      |
|------|----------------------------------------------------|------|
| 2751 | GGTGGATCCCATGGACGAGCCCACCCTTCTTTATGTTTTGTTTGAAGTCT | 2800 |
|      |                                                    |      |
| 2751 | GGTGGATCCCATGGACGAGCCCACCCTTCTTTATGTTTTGTTTGAAGTCT | 2800 |
|      |                                                    |      |
| 2801 | TTGACGTGGTCCGTGTGCACCAGCCGCACCGCGGCGTCATCGAGACCGTG | 2850 |
|      |                                                    |      |
| 2801 | TTGACGTGGTCCGTGTGCACCAGCCGCACCGCGGCGTCATCGAGACCGTG | 2850 |
|      |                                                    |      |
| 2851 | TACCTGCGCACGCCCTTCTCGGCCGGCAACGCCACAACAA.....      | 2900 |
|      |                                                    |      |
| 2851 | TACCTGCGCACGCCCTTCTCGGCCGGCAACGCCACAACAA.....      | 2900 |

Mismatched sequences are printed in bold. The r-strands are shown.
